# Supplementary material
Source: PubMed Central journal article supplement (PMC2393742)

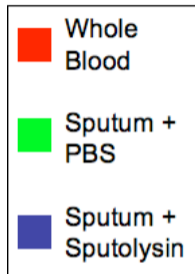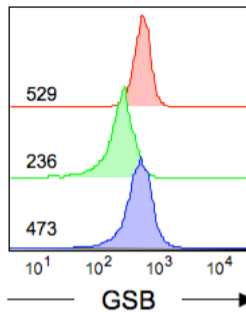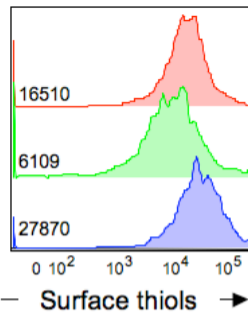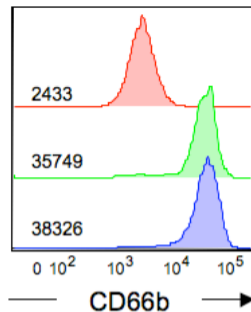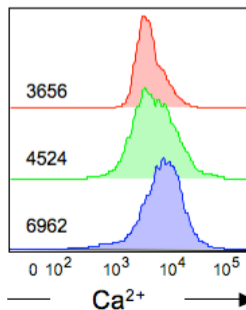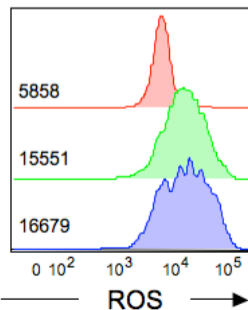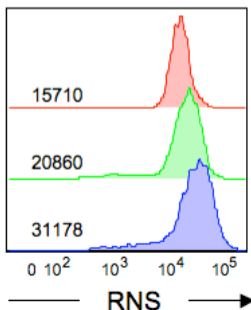

Supplement: pnas_0712386105_1.pdf [file pnas_0712386105_1.pdf]

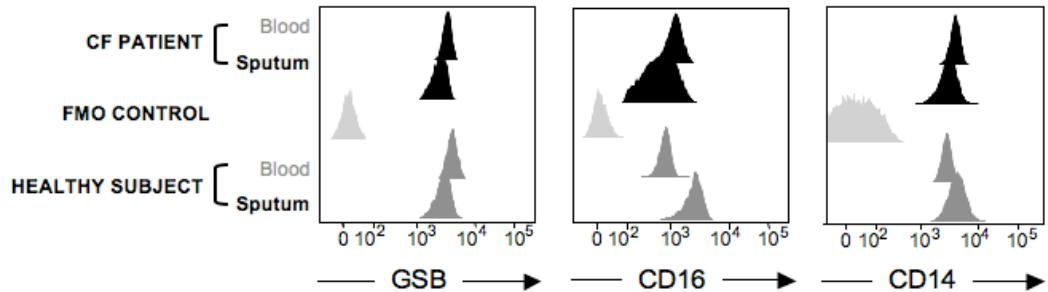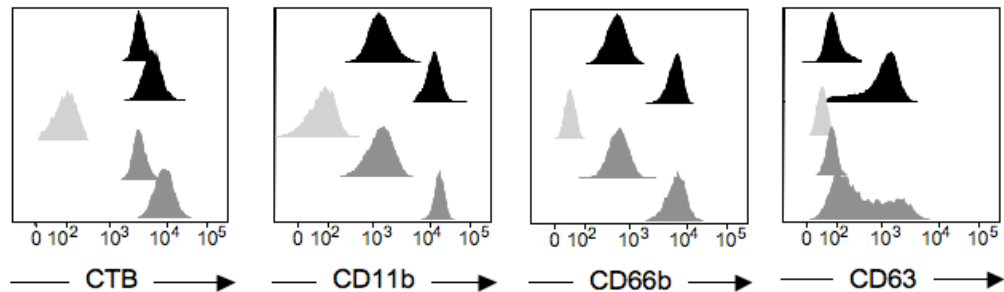

Supplement: pnas_0712386105_3.pdf [file pnas_0712386105_3.pdf]

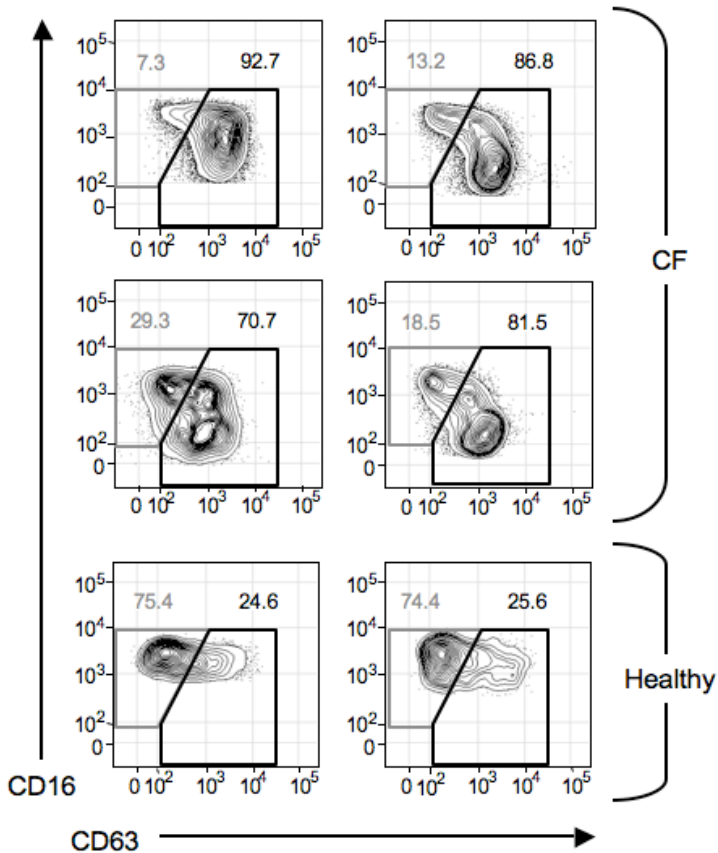

Supplement: pnas_0712386105_4.pdf [file pnas_0712386105_4.pdf]
